# Supplementary material for: In Vitro Performance of Published Glypican 3-Targeting Peptides TJ12P1 and L5 Indicates Lack of Specificity and Potency
Source: PubMed Central journal article supplement (PMC6802730; doi:10.1089/cbr.2019.2888), 2019-10-04
Supplement: Supp_FigureS1.pdf [file Supp_FigureS1.pdf]

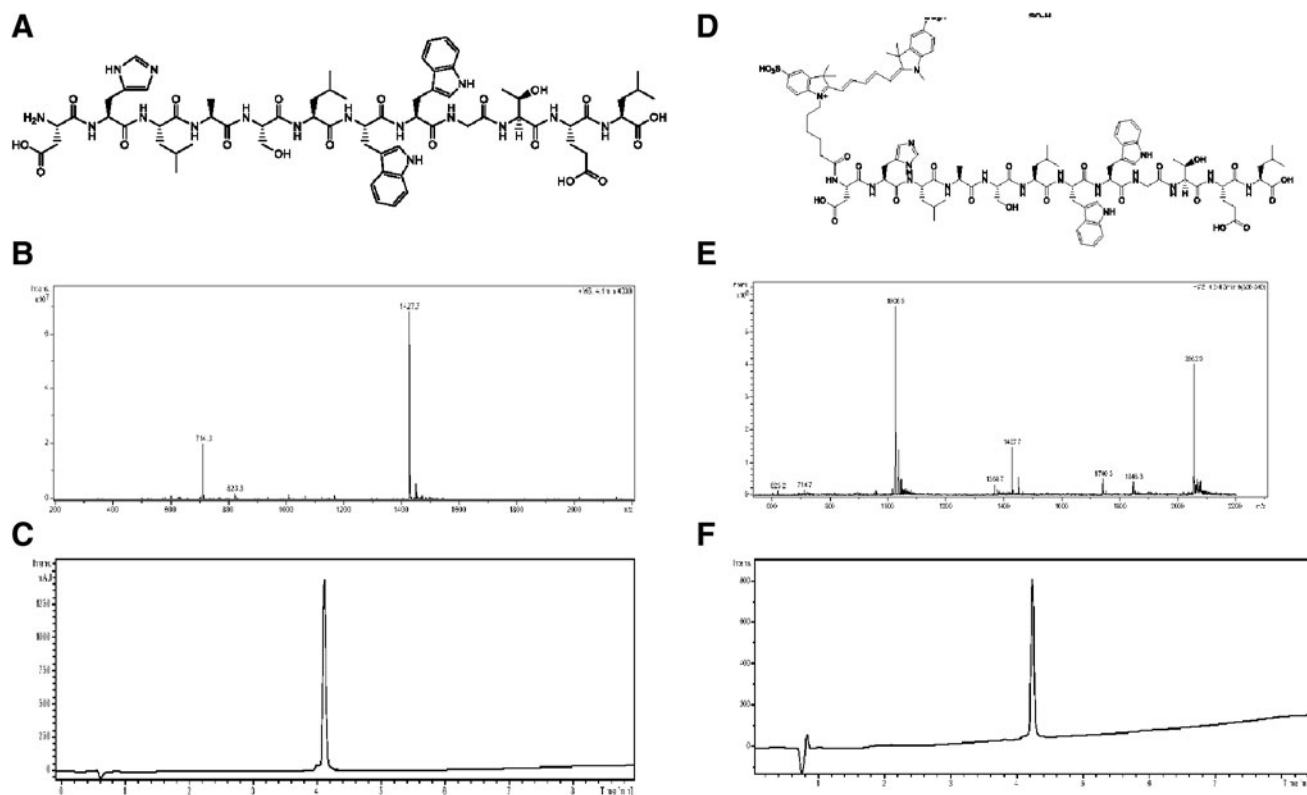

**SUPPLEMENTARY FIG. S1.** Characterization of TJ12P1 and sulfo-Cy5-TJ12P1. **(A)** Chemical structure of TJ12P1 (sequence: DHLASLWWGTEL). Chemical formula:  $C_{67}H_{95}N_{17}O_1$ , Molecular weight: 1426.60 g/mol. **(B)** Mass Spec of TJ12P1, two ions were detected, those of  $[TJ12P1]_2^+$  ( $m/z$  714.3) and  $[TJ12P1]^+$  ( $m/z$  1427.7). **(C)** Analytical HPLC chromatogram of TJ12P1. Retention time ( $t_R$ )=4.18 min using a binary  $H_2O/ACN$  mobile phase containing 0.05% TFA. **(D)** Chemical structure of sulfo-Cy5-TJ12P1. Chemical formula:  $C_{99}H_{132}N_{19}O_{25}S_2^+$ , Molecular weight: 2052.37 g/mol. **(E)** Mass Spec of sulfo-Cy5-TJ12P1, multiple ions were detected with the two dominant peaks of the spectrum being  $[\text{sulfo-Cy5-TJ12P1}]_2^+$  ( $m/z$  1026.9) and  $[\text{sulfo-Cy5-TJ12P1}]^+$  ( $m/z$  2052.9). **(F)** Analytical HPLC chromatogram of sulfo-Cy5-TJ12P1. Retention time ( $t_R$ )=4.22 min using a binary  $H_2O/ACN$  mobile phase containing 0.05% TFA. HPLC, high-performance liquid chromatography; TFA, trifluoroacetic acid.
