# Supplementary material for: In Vitro Performance of Published Glypican 3-Targeting Peptides TJ12P1 and L5 Indicates Lack of Specificity and Potency
Source: PubMed Central journal article supplement (PMC6802730; doi:10.1089/cbr.2019.2888), 2019-10-04
Supplement: Supp_FigureS2.pdf [file Supp_FigureS2.pdf]

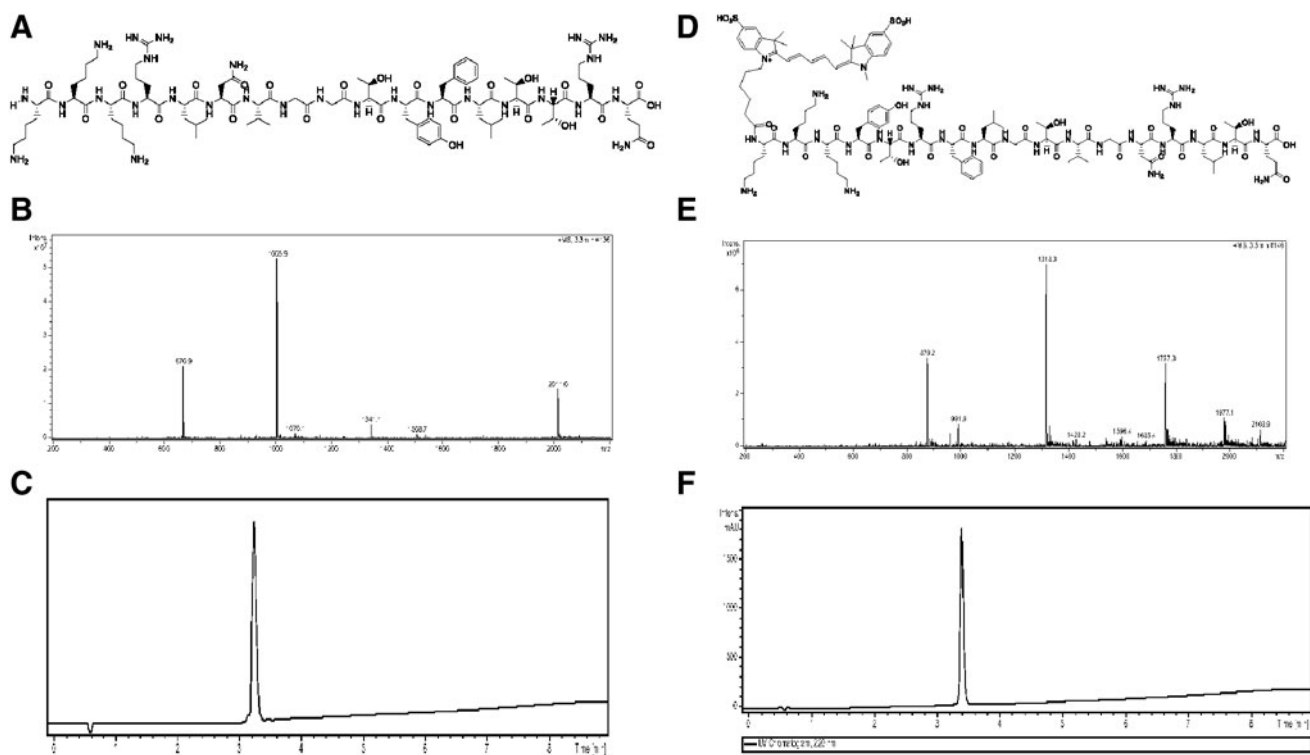

**SUPPLEMENTARY FIG. S2.** Characterization of KKK-L5 and sulfo-Cy5-KKK-L5. **(A)** Chemical structure of KKK-L5 (sequence: KKKRLNVGGTYFLTRQ). Chemical formula:  $C_{90}H_{152}N_{28}O_{24}$ , Molecular weight: 2010.38 g/mol. **(B)** Mass Spec of KKK-L5, multiple ions were detected; of these, two ions and their corresponding peaks were  $[KKK-L5]_2^+$  ( $m/z$  1005.9) and  $[KKK-L5]^+$  ( $m/z$  2011.0). **(C)** Analytical HPLC chromatogram of KKK-L5. Retention time ( $t_R$ ) = 3.24 min using a binary  $H_2O/ACN$  mobile phase containing 0.05% TFA. **(D)** Chemical structure of sulfo-Cy5-KKK-L5. Chemical formula:  $C_{122}H_{189}N_{30}O_{31}S_2^+$ , Molecular weight: 2636.15 g/mol. **(E)** Mass Spec of sulfo-Cy5-KKK-L5, multiple ions were detected with a dominant peak and species of the spectrum being  $[sulfo-Cy5-KKK-L5]^+$  ( $m/z$  1318.3). **(F)** Analytical HPLC chromatogram of sulfo-Cy5-KKK-L5. Retention time ( $t_R$ ) = 3.4 min using a binary  $H_2O/ACN$  mobile phase containing 0.05% TFA.
