# Supplementary material for: In Vitro Performance of Published Glypican 3-Targeting Peptides TJ12P1 and L5 Indicates Lack of Specificity and Potency
Source: PubMed Central journal article supplement (PMC6802730; doi:10.1089/cbr.2019.2888), 2019-10-04
Supplement: Supp_FigureS3.pdf [file Supp_FigureS3.pdf]

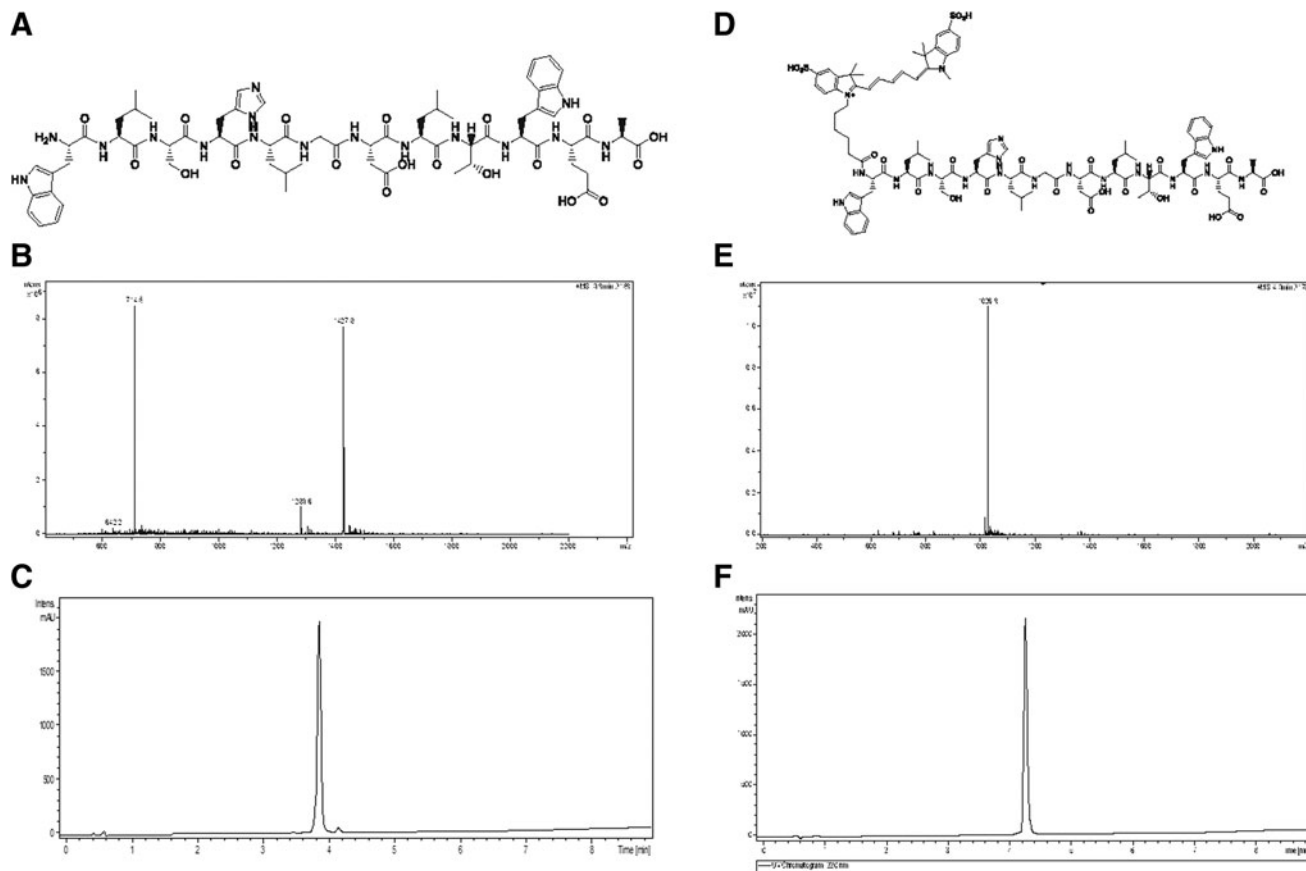

**SUPPLEMENTARY FIG. S3.** Characterization of WLSHLGDLTWEA (scrambled TJ12P1) and sulfo-Cy5-WLSHLGDLTWEA. **(A)** Chemical structure of sulfo-Cy5-TJ12P1 scramble (sequence: WLSHLGDLTWEA). Chemical formula:  $C_{99}H_{131}N_{18}O_{26}S_2$ , Molecular weight: 2053.36 g/mol. **(B)** Mass Spec of sulfo-Cy5-WLSHLGDLTWEA, a single species was detected, namely, the ion [sulfo-Cy5-WLSHLGDLTWEA] $^{2+}$  ( $m/z$  1026.9). **(C)** Analytical HPLC chromatogram of sulfo-Cy5-WLSHLGDLTWEA. Retention time ( $t_R$ )=4.30 min using a binary  $H_2O/ACN$  mobile phase containing 0.05% TFA. **(D)** Chemical structure of Cy5-TJ12P1 scramble (sequence: WLSHLGDLTWEA). Chemical formula:  $C_{67}H_{94}N_{16}O_{19}$ , Molecular weight: 1427.58 g/mol. **(E)** Mass Spec of WLSHLGDLTWEA, two ions were detected, those of [WLSHLGDLTWEA] $^{2+}$  ( $m/z$  714.5) and [WLSHLGDLTWEA] $^{+}$  ( $m/z$  1427.8). **(F)** Analytical HPLC chromatogram of WLSHLGDLTWEA. Retention time ( $t_R$ )=3.90 min using a binary  $H_2O/ACN$  mobile phase containing 0.05% TFA.
