# Supplementary material for: In Vitro Performance of Published Glypican 3-Targeting Peptides TJ12P1 and L5 Indicates Lack of Specificity and Potency
Source: PubMed Central journal article supplement (PMC6802730; doi:10.1089/cbr.2019.2888), 2019-10-04
Supplement: Supp_FigureS4-TableS1.pdf [file Supp_FigureS4-TableS1.pdf]

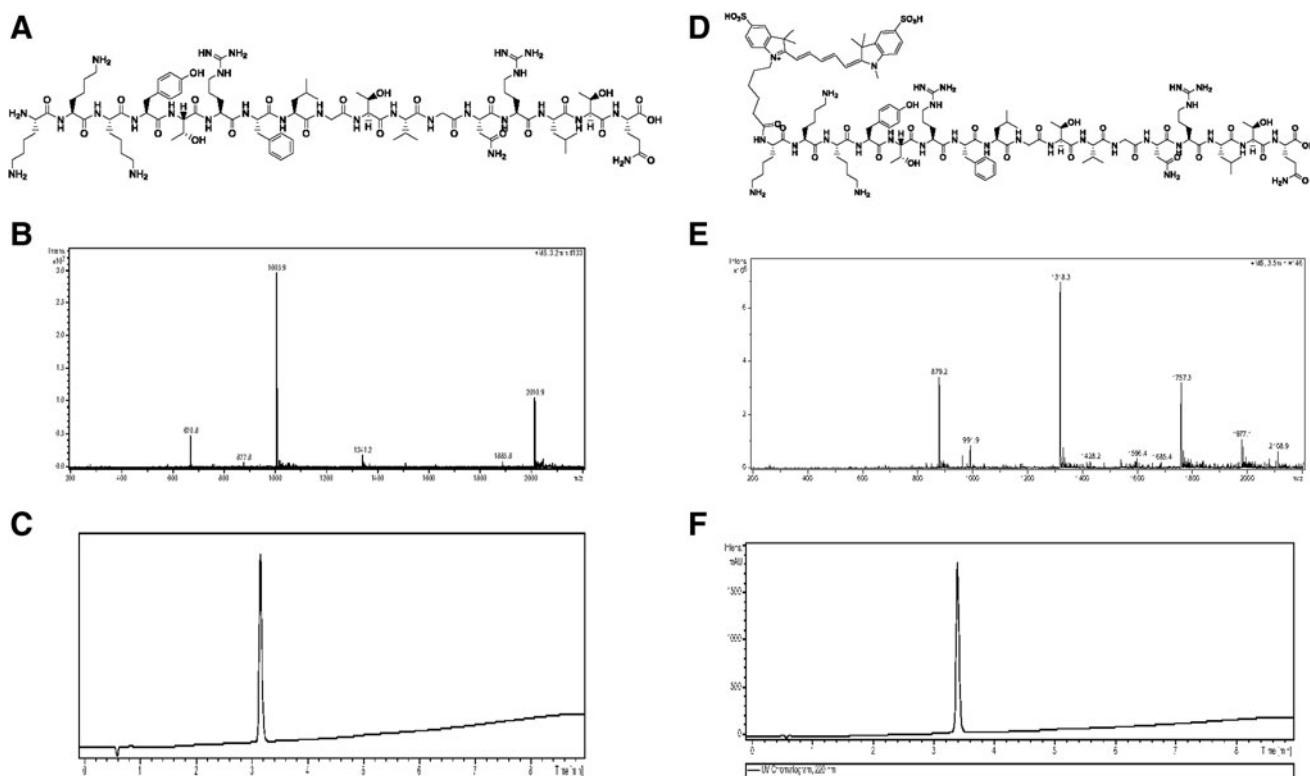

**SUPPLEMENTARY FIG. S4.** Characterization of KKKYTRFLGTVGNRLTQ (scrambled KKK-L5) and sulfo-Cy5-KKKYTRFLGTVGNRLTQ. (A) Chemical structure of Sulfo-Cy5-KKKYTRFLGTVGNRLTQ (sequence: KKKYTRFLGTVGNRLTQ). Chemical formula:  $C_{122}H_{189}N_{30}O_{31}S_2$ , Molecular weight: 2636.15 g/mol. (B) Mass Spec of Sulfo-Cy5-KKKYTRFLGTVGNRLTQ, multiple ions were detected; of these, the dominant peak was the ion [Sulfo-Cy5-KKKYTRFLGTVGNRLTQ] $^{2+}$  ( $m/z$  1318.3). (C) Analytical HPLC chromatogram of Sulfo-Cy5-KKKYTRFLGTVGNRLTQ. Retention time ( $t_R$ ) = 3.50 min using a binary  $H_2O/ACN$  mobile phase containing 0.05% TFA. (D) Chemical structure of scrambled KKK-L5 (sequence: KKKYTRFLGTVGNRLTQ). Chemical formula:  $C_{90}H_{152}N_{28}O_{24}$ , Molecular weight: 2010.38 g/mol. (E) Mass Spec of KKKYTRFLGTVGNRLTQ, multiple ions were detected, two ions were detected as being most dominant, those of [KKKYTRFLGTVGNRLTQ] $^{2+}$  ( $m/z$  1005.9) and [KKKYTRFLGTVGNRLTQ] $^{+}$  ( $m/z$  2010.9). (F) Analytical HPLC chromatogram of KKKYTRFLGTVGNRLTQ. Retention time ( $t_R$ ) = 3.20 min using a binary  $H_2O/ACN$  mobile phase containing 0.05% TFA.

**SUPPLEMENTARY TABLE S1. LIST OF PEPTIDE SEQUENCES AND THE ASSOCIATED CLEAVAGE PROCEDURES AND YIELDS**

| Sequence                                | Cleavage procedure | Yield                  |
|-----------------------------------------|--------------------|------------------------|
| Sulfo-Cy5-DHLASLWWGTEL                  | A and C            | 10%; blue solid        |
| DHLASLWWGTEL                            | B                  | 24.4%; colorless solid |
| Sulfo-Cy5-WLSHLGDLTWEA (scrambled)      | A and C            | 11%; blue solid        |
| WLSHLGDLTWEA (scrambled)                | B                  | 23.2%; colorless solid |
| Sulfo-Cy5-KKKRLNVGGTYFLTTRQ             | A and C            | 13%; blue solid        |
| KKKRLNVGGTYFLTTRQ                       | B                  | 30%                    |
| Sulfo-Cy5-KKKYTRFLGTVGNRLTQ (scrambled) | A and C            | 11.5%; blue solid      |
| KKKYTRFLGTVGNRLTQ (scrambled)           | B                  | 28%; colorless solid   |
